# Supplementary material
Source: PubMed Central journal article supplement (PMC3293558)
Supplement: supp_M111.334599_jbc.M111.334599-1.pdf [file supp_M111.334599_jbc.M111.334599-1.pdf]

**SUPPLEMENTAL TABLE S1**

| <b>Primer Name</b>           | <b>Sequence (5' to 3')</b>         |
|------------------------------|------------------------------------|
| <b>Luciferase Constructs</b> |                                    |
| mPerp-578 -F                 | TAACTGGGGCAAAGGGAACTGAAGTTATCAACAC |
| mPerp-553- F                 | TTATCAACACCAAAGCTACCCGGATTAAGAGAC  |
| mPerp-434- F                 | CAGCAAGAGCCAAGGTCCAAAGGTAG         |
| mPerp-402- F                 | GCAGGAAGTGTAGGATCTGCCTGT           |
| mPerp-233- F                 | TAATTTAGGGCAGAGCACAGGCTGG          |
| mPerp-208- F                 | CGCTGGAGTGTCCACAGGTGTGTG           |
| mPerp-106- F                 | CGAGCCTGAGCTCTGCCG                 |
| mPerp-84- F                  | GACCCAGCAGGTCGGGGC                 |
| mPerp+49-R                   | TTAACTGACACCGCGACTAAAGGAAGAG       |
| <b>ChIP</b>                  |                                    |
| mBmp7-site1-F                | CGGGCCAGAACTGAGTAAAG               |
| mBmp7-site1-R                | ACCCGAGGTCACCTTGCTG                |
| mBmp7-site2-F                | CCGGATGCTTTCCTAGCAC                |
| mBmp7-site2-R                | CAGGGACCCAGAGAGAAGAA               |
| mBmp7-site3-F                | ATCTGTGTGGCCAGTCTCT                |
| mBmp7-site3-R                | TTGGGTAGAGGAGGGATGTG               |
| mPerp-site1-F                | GGTGCTTGGAGCTCAAGTGT               |
| mPerp-site1-R                | CACACACCTGTGGACACTCC               |
| mPerp-site2-F                | CTGAACCACCAGAGCACAGA               |
| mPerp-site2-R                | GCTTCCACAGGCAGATCCTA               |
| mPerp-site3-F                | GGGTAGATGTGTGGGGAACA               |
| mPerp-site3-R                | TGCGGAGGCTGTCTCTTAAT               |
| mFXIIIB-F                    | CAGTTCAAAGCTTGTAACAGCA             |
| mFXIIIB-R                    | TACGGAAGGGTATATTTCAAGTCA           |
